# Supplementary material for: Analysis of the grape MYB R2R3 subfamily reveals expanded wine quality-related clades and conserved gene structure organization across Vitis and Arabidopsis genomes
Source: PubMed Central journal article supplement (PMC2507771; doi:10.1186/1471-2229-8-83), 2008-07-22
Supplement: 1471-2229-8-83-S2.pdf [file 1471-2229-8-83-S2.pdf]

**Additional file 2 . List of R2R3 MYB annotated genes in the Grape Genome with their possible orthologues in sequenced plant species**

| BLAT Search using R2R3Myb consensus sequence   |                |                                               |     |               |                          | Description for each Annotated Identifier |                        |                                    |                |                 |     |     |     |   |
|------------------------------------------------|----------------|-----------------------------------------------|-----|---------------|--------------------------|-------------------------------------------|------------------------|------------------------------------|----------------|-----------------|-----|-----|-----|---|
| Annotated Identifier by Genoscope(1)           | BLAT Score (2) | Subject region used for LA (3)<br>Start / End |     | LA % Identity | Chromosome (size)        | Str (4)                                   | Position on Chr        | Orthologue prediction by Genoscope | Protein Length | Length per exon |     |     |     |   |
|                                                |                |                                               |     |               |                          |                                           |                        |                                    |                | 1               | 2   | 3   | 4   | 5 |
| GSVIVT00030469001                              | 53             | 35                                            | 106 | 87.5%         |                          | ++                                        | 4311143..<br>4312801   | <i>P trichocarpa</i><br>566512     | 225            | 130             | 130 | 418 |     |   |
| GSVIVT00030108001                              | 28             | 35                                            | 78  | 81.9%         |                          | ++                                        | 999398..<br>1009443    | -                                  | 80             | 57              | 43  | 143 |     |   |
| GSVIVT00030360001                              | 33             | 35                                            | 100 | 75.8%         | Chr1<br>(15630816)       | ++                                        | 3358494..<br>3359580   | AtMYB62<br>(AT1G68320)             | 288            | 148             | 130 | 589 |     |   |
| GSVIVT00030107001                              | 31             | 34                                            | 78  | 84.5%         |                          | ++                                        | 996625..<br>998672     | -                                  | 225            | 145             | 142 | 391 |     |   |
| GSVIVT00021123001                              | 25             | 34                                            | 106 | 67.2%         |                          | +-                                        | 10921708..<br>10922822 | <i>Oryza sativa</i><br>07_03_0483  | 345            | 130             | 908 |     |     |   |
| GSVIVT00036919001                              | 25             | 35                                            | 77  | 79.1%         | Chr1_random<br>(5496190) | +-                                        | 1125809..<br>1127755   | -                                  | 207            | 133             | 130 | 361 |     |   |
| GSVIVT00002700001                              | 23             | 34                                            | 78  | 75.6%         |                          | ++                                        | 326291..<br>327392     | -                                  | 220            | 118             | 130 | 415 |     |   |
| GSVIVT00006679001                              | 54             | 35                                            | 106 | 87.5%         |                          | +-                                        | 1800939..<br>1801850   | <i>P trichocarpa</i><br>774521     | 271            | 133             | 683 |     |     |   |
| GSVIVT00015729001                              | 53             | 2                                             | 105 | 76.0%         |                          | +-                                        | 7975498..<br>7976604   | -                                  | 335            | 263             | 745 |     |     |   |
| GSVIVT00038769001                              | 35             | 35                                            | 98  | 78.2%         |                          | +-                                        | 12521876..<br>12522634 | -                                  | 72             | 40              | 134 | 45  |     |   |
| GSVIVT00038755001                              | -              | -                                             | -   | -             |                          | +-                                        |                        | -                                  | 89             | 115             | 134 | 21  |     |   |
| GSVIVT00038759001<br><b>VvMYBA3 (ABL14067)</b> | 26             | 34                                            | 77  | 79.6%         | Chr2<br>(17603400)       | +-                                        | 12388746..<br>12389372 | -                                  | 266            | 115             | 130 | 556 |     |   |
| GSVIVT00038760001                              | -              | -                                             | -   | -             |                          | +-                                        |                        | -                                  | 205            | 115             | 134 | 99  | 270 |   |

|                                                |    |    |     |       |                    |    |                        |                                   |     |     |     |         |
|------------------------------------------------|----|----|-----|-------|--------------------|----|------------------------|-----------------------------------|-----|-----|-----|---------|
| GSVIVT00038762001<br><b>VvMYBA1 (ABL14063)</b> | -  | -  | -   | -     |                    | +- | 12448352..<br>12449010 | -                                 | 250 | 115 | 130 | 508     |
| GSVIVT00038763001<br><b>VvMYBA1 (ABL14063)</b> | 26 | 34 | 77  | 79.6% |                    | +- | 12449064..<br>12449458 | -                                 | 97  | 115 | 179 |         |
| GSVIVT00038766001                              | -  | -  | -   | -     | Chr2<br>(17603400) |    |                        | -                                 | 97  | 115 | 134 | 45      |
| GSVIVT00002546001                              | 23 | 35 | 77  | 76.8% |                    | +- | 241759..<br>243376     | AtMYB103<br>(AT1G63910)           | 304 | 133 | 130 | 652     |
| GSVIVT00007276001                              | 21 | 78 | 106 | 86.3% |                    | +- | 4813722..<br>4815373   | AtMYB85<br>(AT4G22680)            | 268 | 263 | 544 |         |
| GSVIVT00038768001<br><b>VvMYBA2 (ABL14065)</b> | -  | -  | -   | -     |                    | +- | 12516756..<br>12517438 | -                                 | 154 | 115 | 118 | 232     |
| GSVIVT00036110001<br><b>VvMYB4 (EF113078)</b>  | 62 | 4  | 106 | 80.6% | Chr3<br>(10186927) | +- | 1569838..<br>1571267   | AtMYB4<br>(AT4G38620)             | 251 | 263 | 493 |         |
| GSVIVT00036753001                              | 60 | 4  | 106 | 79.7% |                    | +- | 15106462..<br>15107594 | <i>Oryza sativa</i><br>08_02_1496 | 242 | 263 | 466 |         |
| GSVIVT00032265001                              | 53 | 34 | 105 | 87.5% |                    | ++ | 1441131..<br>1442325   | -                                 | 276 | 133 | 130 | 568     |
| GSVIVT00032266001                              | 53 | 34 | 105 | 87.5% |                    | ++ | 1442841..<br>1459186   | -                                 | 241 | 20  | 20  | 130 556 |
| GSVIVT00032269001                              | 52 | 34 | 104 | 87.4% |                    | ++ | 1469159..<br>1470016   | -                                 | 226 | 130 | 130 | 421     |
| GSVIVT00032272001                              | 46 | 35 | 105 | 83.1% | Chr4<br>(19293076) | +- | 1483857..<br>1484857   | <i>P trichocarpa</i><br>668851    | 197 | 136 | 130 | 328     |
| GSVIVT00032264001                              | 32 | 34 | 77  | 86.4% |                    | +- | 1420106..<br>1421806   | <i>P trichocarpa</i><br>415884    | 265 | 133 | 130 | 535     |
| GSVIVT00032268001                              | 28 | 34 | 77  | 81.9% |                    | ++ | 1466509..<br>1467957   | -                                 | 270 | 130 | 130 | 553     |
| GSVIVT00032142001                              | 21 | 35 | 61  | 88.9% |                    | ++ | 552989..<br>553782     | -                                 | 118 | 136 | 221 |         |
| GSVIVT00034800001                              | 15 | 40 | 96  | 66.0% |                    | ++ | 18268662..<br>18269870 | -                                 | 302 | 154 | 755 |         |

|                                                |    |    |     |       |                    |    |                        |                                   |     |     |      |            |
|------------------------------------------------|----|----|-----|-------|--------------------|----|------------------------|-----------------------------------|-----|-----|------|------------|
| GSVIVT00033189001                              | 29 | 35 | 100 | 72.8% |                    | +- | 1570203..<br>1571710   | AtMYB108-BOS1<br>(AT3G06490)      | 306 | 157 | 130  | 634        |
| GSVIVT00020265001                              | 29 | 34 | 78  | 82.3% |                    | ++ | 7897789..<br>7899269   | <i>Oryza sativa</i><br>04_04_0514 | 267 | 133 | 130  | 541        |
| GSVIVT00020267001                              | 28 | 34 | 77  | 81.9% | Chr5<br>(23428299) | ++ | 7908863..<br>7910462   | AtMYB15<br>(AT3G23250)            | 253 | 133 | 130  | 499        |
| GSVIVT00019744001                              | 23 | 35 | 79  | 75.6% |                    | ++ | 2777145..<br>2778204   | -                                 | 297 | 133 | 130  | 631        |
| GSVIVT00033103001                              | 19 | 35 | 77  | 72.1% |                    | +- | 803644..<br>805722     | -                                 | 383 | 133 | 130  | 889        |
| GSVIVT00024797001<br><b>VvMYB5b (AAX51291)</b> | 41 | 1  | 77  | 76.7% |                    | ++ | 728440..<br>729634     | <i>Oryza sativa</i><br>01_06_0367 | 312 | 302 | 637  |            |
| GSVIVT00017281001                              | 35 | 2  | 100 | 68.9% | Chr6<br>(24148918) | +- | 14294469..<br>14299041 | -                                 | 460 | 336 | 1047 |            |
| GSVIVT00024611001                              | 30 | 2  | 78  | 76.8% |                    | ++ | 2562202..<br>2564124   | AtMYB83<br>(AT3G08500)            | 325 | 296 | 682  |            |
| GSVIVT00022176001                              | 18 | 35 | 64  | 80.0% |                    | +- | 22102247..<br>22117492 | AtMYB38<br>(AT2G36890)            | 299 | 136 | 130  | 500 134    |
| <b>GSVIVT00028596001</b>                       | 28 | 35 | 78  | 81.9% |                    | ++ | 6618108..<br>6621275   | AtMYB14<br>(AT2G31180)            | 269 | 133 | 130  | 547        |
| GSVIVT00010586001                              | 27 | 35 | 104 | 70.0% | Chr7<br>(15233747) | +- | 10332185..<br>10333643 | -                                 | 102 | 136 | 134  | 39         |
| <b>GSVIVT00028082001</b>                       | 24 | 35 | 78  | 77.3% |                    | +- | 4096409..<br>4098680   | AtMYB12<br>(AT2G47460)            | 367 | 133 | 130  | 841        |
| GSVIVT00028163001                              | 16 | 35 | 78  | 68.2% |                    | +- | 4751031..<br>4752072   | -                                 | 285 | 151 | 130  | 577        |
| GSVIVT00025459001<br><b>VvMYBCs1(AAS68190)</b> | 41 | 1  | 77  | 80.6% |                    | +- | 19879628..<br>19880963 | AtMYB5<br>(AT3G13540)             | 320 | 287 | 676  |            |
| GSVIVT00000609001                              | 33 | 34 | 104 | 82.4% | Chr8<br>(21557227) | +- | 17790635..<br>17791607 | AtMYB27<br>(AT3G53200)            | 123 | 115 | 130  | 127        |
| <b>GSVIVT00033681001</b>                       | 27 | 35 | 77  | 81.4% |                    | ++ | 1265357..<br>1266809   | AtMYB60<br>(AT1G08810)            | 279 | 133 | 130  | 90 235 252 |

|                   |    |    |     |       |                     |    |                        |                                |     |     |     |     |     |
|-------------------|----|----|-----|-------|---------------------|----|------------------------|--------------------------------|-----|-----|-----|-----|-----|
| GSVIVT00000629001 | 18 | 35 | 64  | 80.0% |                     | ++ | 17944682..<br>17946528 | <i>P trichocarpa</i><br>273997 | 342 | 136 | 130 | 763 |     |
| GSVIVT00034097001 | 55 | 34 | 105 | 88.9% |                     | +- | 1171381..<br>1172557   | -                              | 301 | 133 | 130 | 643 |     |
| GSVIVT00034098001 | 47 | 35 | 106 | 83.4% | Chr9<br>(16532244)  | +- | 1182783..<br>1184304   | -                              | 263 | 133 | 130 | 529 |     |
| GSVIVT00034095001 | 49 | 34 | 105 | 84.8% |                     | ++ | 1158346..<br>1159150   | <i>P trichocarpa</i><br>582403 | 203 | 154 | 130 | 328 |     |
| GSVIVT00016466001 | 52 | 35 | 105 | 87.4% |                     | +- | 1020903..<br>1021733   | -                              | 230 | 50  | 643 |     |     |
| GSVIVT00016944001 | 43 | 35 | 104 | 81.5% |                     | ++ | 5080530..<br>5081411   | AtMYB82<br>(AT5G52600)         | 223 | 136 | 130 | 406 |     |
| GSVIVT00016470001 | 30 | 34 | 77  | 84.1% |                     | +- | 1041702..<br>1043283   | -                              | 133 | 133 | 269 |     |     |
| GSVIVT00016622001 | 22 | 35 | 64  | 86.7% |                     | +- | 2170576..<br>2171358   | -                              | 104 | 136 | 134 | 45  |     |
| GSVIVT00016947001 | 21 | 78 | 104 | 88.9% | Chr11<br>(13936303) | ++ | 5098789..<br>5099813   | -                              | 269 | 274 | 130 | 406 |     |
| GSVIVT00016942001 | 19 | 41 | 77  | 75.7% |                     | ++ | 5066573..<br>5067111   | -                              | 142 | 23  | 406 |     |     |
| GSVIVT00031433001 | 18 | 35 | 60  | 84.7% |                     | ++ | 13389175..<br>13390645 | AtMYB36<br>(AT5G57620)         | 366 | 136 | 123 | 13  | 829 |
| GSVIVT00016469001 | 52 | 35 | 105 | 87.4% |                     | +- | 1032035..<br>1033915   | -                              | 220 | 133 | 130 | 400 |     |
| GSVIVT00029213001 | 39 | 35 | 106 | 77.8% |                     | ++ | 10101435..<br>10102634 | -                              | 334 | 133 | 130 | 742 |     |
| GSVIVT00029221001 | 39 | 35 | 106 | 77.8% |                     | +- | 10183659..<br>10184852 | <i>P trichocarpa</i><br>239794 | 257 | 133 | 130 | 511 |     |
| GSVIVT00029219001 | 36 | 35 | 104 | 84.7% | Chr12<br>(18540817) | +- | 10171223..<br>10172581 | -                              | 252 | 133 | 130 | 496 |     |
| GSVIVT00025883001 | 34 | 1  | 100 | 68.1% |                     | ++ | 7290073..<br>7291534   | AtMYB101<br>(AT2G32460)        | 426 | 336 | 945 |     |     |

|                          |    |    |     |        |                            |    |                        |                             |     |     |      |     |        |
|--------------------------|----|----|-----|--------|----------------------------|----|------------------------|-----------------------------|-----|-----|------|-----|--------|
| GSVIVT00028808001        | 25 | 34 | 78  | 77.8%  | Chr13<br>(15191948)        | +- | 14610873..<br>14612392 | -                           | 289 | 188 | 682  |     |        |
| GSVIVT00001720001        | 15 | 86 | 100 | 100.0% |                            | +- | 10141782..<br>10147862 | AtMYB33<br>(AT5G06100)      | 551 | 363 | 1009 | 123 | 161    |
| GSVIVT00020733001        | 46 | 34 | 106 | 82.2%  |                            | +- | 16909499..<br>16910521 | -                           | 217 | 118 | 130  | 406 |        |
| GSVIVT00020833001        | 33 | 35 | 106 | 73.7%  |                            | ++ | 17588097..<br>17589575 | AtMYB35<br>(AT3G28470)      | 320 | 133 | 130  | 544 | 156    |
| GSVIVT00020968001        | 26 | 35 | 78  | 79.6%  |                            | +- | 18699080..<br>18700450 | AtMYB30<br>(AT3G28910)      | 327 | 133 | 130  | 721 |        |
| GSVIVT00021000001        | 25 | 35 | 77  | 79.1%  | Chr14<br>(19480434)        | ++ | 18963442..<br>18965217 | AtMYB106<br>(AT3G01140)     | 330 | 133 | 130  | 352 | 42 336 |
| GSVIVT00032972001        | 21 | 34 | 58  | 92.0%  |                            | +- | 8392290..<br>8401583   | AtMYB20<br>(AT1G66230)      | 289 | 133 | 130  | 607 |        |
| GSVIVT00020581001        | 20 | 35 | 82  | 70.9%  |                            | ++ | 15556689..<br>15558153 | AtMYB40<br>(AT5G14340)      | 268 | 133 | 130  | 544 |        |
| <b>GSVIVT00020719001</b> | 18 | 35 | 78  | 70.5%  |                            | ++ | 16764197..<br>16768191 | AtMYB24<br>(AT5G40350)      | 189 | 136 | 130  | 304 |        |
| GSVIVT00038075001        | 18 | 77 | 104 | 82.2%  |                            | +- | 12582574..<br>12583545 | AtMYB121<br>(AT3G30210)     | 247 | 142 | 130  | 472 |        |
| GSVIVT00022367001        | 52 | 34 | 106 | 86.4%  |                            | ++ | 2966946..<br>2967891   | -                           | 228 | 130 | 130  | 427 |        |
| GSVIVT00022409001        | 44 | 35 | 105 | 81.7%  |                            | +- | 3849020..<br>3850240   | -                           | 263 | 169 | 148  | 475 |        |
| GSVIVT00022423001        | 42 | 35 | 105 | 80.3%  | Chr14_rando<br>m (5432426) | +- | 4288060..<br>4290721   | AtMYB75-PAP1<br>(AT1G56650) | 243 | 118 | 139  | 475 |        |
| GSVIVT00022415001        | 30 | 35 | 78  | 84.1%  |                            | +- | 4047444..<br>4048716   | AtMYB90-PAP2<br>(AT1G66390) | 246 | 118 | 139  | 484 |        |
| GSVIVT00002213001        | 25 | 35 | 77  | 79.1%  |                            | ++ | 913314..<br>914803     | -                           | 95  | 133 | 134  | 21  |        |
| GSVIVT00026803001        | 48 | 1  | 77  | 81.9%  | Chr15_rando<br>m (4297576) | ++ | 2162264..<br>2165161   | AtMYB17<br>(AT3G61250)      | 302 | 133 | 130  | 646 |        |

|                          |    |    |     |       |                            |    |                        |                                   |     |     |     |     |
|--------------------------|----|----|-----|-------|----------------------------|----|------------------------|-----------------------------------|-----|-----|-----|-----|
| GSVIVT00013992001        | 37 | 1  | 77  | 74.1% | Chr16<br>(8158851)         | +- | 1351513..<br>1364135   | AtMYB107<br>(AT3G02940)           | 330 | 257 | 736 |     |
| GSVIVT00013995001        | 8  | 34 | 77  | 59.1% |                            | +- | 1411388..<br>1435018   | -                                 | 169 | 248 | 211 | 51  |
| GSVIVT00008781001        | 19 | 78 | 106 | 82.8% | Chr16_rando<br>m (4524411) | ++ | 3555527..<br>3557038   | -                                 | 261 | 154 | 73  | 559 |
| GSVIVT00017798001        | 56 | 34 | 106 | 89.1% |                            | +- | 2459123..<br>2461057   | -                                 | 175 | 130 | 130 | 268 |
| GSVIVT00017797001        | 55 | 35 | 106 | 88.9% |                            | +- | 2464208..<br>2465491   | -                                 | 229 | 178 | 130 | 382 |
| GSVIVT00017698001        | 31 | 35 | 100 | 74.3% |                            | +- | 3444848..<br>3446270   | -                                 | 328 | 151 | 130 | 706 |
| <b>GSVIVT00016337001</b> | 26 | 35 | 78  | 79.6% | Chr17<br>(13059092)        | ++ | 6869110..<br>6870718   | AtMYB31<br>(AT1G74650)            | 307 | 133 | 130 | 661 |
| GSVIVT00016311001        | 25 | 35 | 77  | 79.1% |                            | ++ | 7086341..<br>7087632   | -                                 | 330 | 133 | 130 | 730 |
| GSVIVT00016004001        | 22 | 35 | 78  | 75.0% |                            | ++ | 10759745..<br>10761118 | <i>P trichocarpa</i><br>423254    | 367 | 133 | 130 | 841 |
| GSVIVT00016076001        | 22 | 35 | 78  | 75.0% |                            | +- | 9813627..<br>9814524   | AtMYB66-WER<br>(AT5G1475)         | 216 | 118 | 130 | 403 |
| GSVIVT00000055001        | 20 | 35 | 78  | 72.8% |                            | +- | 5917584..<br>5919123   | <i>Oryza sativa</i><br>03_02_0675 | 337 | 143 | 120 | 751 |
| GSVIVT00015010001        | 34 | 35 | 106 | 80.4% | Chr18<br>(19691255)        | ++ | 6829941..<br>6831217   | <i>Oryza sativa</i><br>03_06_0112 | 340 | 136 | 130 | 757 |
| GSVIVT00015233001        | 20 | 34 | 77  | 72.8% |                            | ++ | 4371454..<br>4372597   | AtMYB93<br>(AT1G34670)            | 324 | 133 | 130 | 712 |
| GSVIVT00038661001        | 50 | 35 | 101 | 88.1% | Chr18_rando<br>m (5949186) | +- | 3692097..<br>3693231   | -                                 | 237 | 133 | 130 | 451 |
| GSVIVT00038662001        | 47 | 35 | 106 | 83.4% |                            | +- | 3705618..<br>3706531   | -                                 | 238 | 133 | 130 | 454 |
| GSVIVT00027308001        | 31 | 2  | 100 | 66.7% | Chr19                      | +- | 6638859..<br>6640552   | -                                 | 381 | 327 | 819 |     |

|                                                |    |    |     |       |                                 |    |                          |                                   |                        |       |     |     |     |
|------------------------------------------------|----|----|-----|-------|---------------------------------|----|--------------------------|-----------------------------------|------------------------|-------|-----|-----|-----|
| GSVIVT00027577001                              | 21 | 35 | 77  | 74.5% | (14071813)                      | ++ | 3934378..<br>3935733     | <i>P trichocarpa</i><br>811245    | 341                    | 133   | 130 | 272 | 491 |
| GSVIVT00002107001                              | 17 | 34 | 78  | 68.9% | Chr19_rando<br>m (1912523)      | ++ | 1371840..<br>1373040     | AtMYB67<br>(AT3G12720)            | 337                    | 130   | 130 | 754 |     |
| GSVIVT00008644001<br><b>VvMYBPA1(CAJ90831)</b> | 62 | 35 | 106 | 93.1% |                                 | +- | 51310430..<br>51311315   | -                                 | 286                    | 133   | 728 |     |     |
| GSVIVT00009522001                              | 54 | 34 | 106 | 87.7% |                                 | ++ | 60623218..<br>60624010   | -                                 | 195                    | 142   | 130 | 316 |     |
| GSVIVT00002010001                              | 49 | 34 | 105 | 84.8% |                                 | ++ | 17409980..<br>17410952   | -                                 | 263                    | 133   | 130 | 529 |     |
| GSVIVT00008477001                              | 39 | 35 | 106 | 77.8% |                                 | ++ | 147357901..<br>147359144 | -                                 | 346                    | 133   | 130 | 778 |     |
| GSVIVT00013087001                              | 39 | 35 | 106 | 77.8% |                                 | +- | 84780902..<br>84782192   | <i>Oryza sativa</i><br>07_03_0877 | 362                    | 133   | 130 | 826 |     |
| GSVIVT00013648001                              | 39 | 35 | 106 | 77.8% |                                 | +- | 88327164..<br>88328454   | AtMYB102<br>(AT4G21440)           | 362                    | 133   | 130 | 826 |     |
| GSVIVT00007128001                              | 37 | 35 | 106 | 76.4% | Chr<br>Un_random<br>(154883714) | +- | 45190481..<br>45191693   | -                                 | 330                    | 133   | 130 | 730 |     |
| GSVIVT00010501001                              | 28 | 35 | 78  | 81.9% |                                 | ++ | 64517813..<br>64519819   | -                                 | 296                    | 133   | 130 | 628 |     |
| GSVIVT00009898001                              | 27 | 34 | 78  | 80.0% |                                 | +- | 135757338..<br>135757972 | -                                 | 89                     | 115   | 134 | 21  |     |
| GSVIVT00035708001                              | 25 | 35 | 77  | 79.1% |                                 | +- | 132844356..<br>132846672 | AtMYB63<br>(AT1G79180)            | 327                    | 139   | 130 | 715 |     |
| GSVIVT00003904001                              | 19 | 35 | 77  | 72.1% |                                 | +- | 89062565..<br>89063760   | <i>Oryza sativa</i><br>06_01_0828 | 330                    | 133   | 130 | 730 |     |
| GSVIVT00010034001                              | 18 | 35 | 60  | 84.7% |                                 | +- | 149868463..<br>149869714 | AtMYB84<br>(AT3G49690)            | 339                    | 136   | 130 | 754 |     |
| GSVIVT00010499001                              | 14 | 78 | 105 | 75.0% |                                 | ++ | 64506147..<br>64507827   | AtMYB18<br>(AT4G25560)            | 298                    | 142   | 130 | 625 |     |
|                                                |    |    |     |       |                                 |    |                          |                                   | Average Prot<br>Length | 264.6 |     |     |     |

Random chromosomes contains sequences that have been assigned to a particular grape chromosome but their position could not be determined in relation to other sequences. ChrUn\_random contains ultracontigs that could not be placed on a certain chromosome. These were joined together into

- (1) Gene prediction and data integration was performed by Genoscope with GAZE computational framework (Howe *et al.* , 2002).
- (2) BLAT finds sequences of 20 amino acids or more with 80% or higher similarity in the genome, by keeping an index of the entire genome in memory.
- (3) LA: Local alignment between query (R2R3Myb DNA-binding domain consensus sequence) and subjects.
- (4) Str: The first strand corresponds to the grape genomic sequence and the second corresponds to the query sequence.
