# Supplementary material for: Analysis of the grape MYB R2R3 subfamily reveals expanded wine quality-related clades and conserved gene structure organization across Vitis and Arabidopsis genomes
Source: PubMed Central journal article supplement (PMC2507771; doi:10.1186/1471-2229-8-83), 2008-07-22
Supplement: 1471-2229-8-83-S3.pdf [file 1471-2229-8-83-S3.pdf]

| MYB | Length per exon |     |     |     |   | ORF bp | Protein Length | TAIR ID           | Function REF*              |
|-----|-----------------|-----|-----|-----|---|--------|----------------|-------------------|----------------------------|
|     | 1               | 2   | 3   | 4   | 5 |        |                |                   |                            |
| 0   | 139             | 130 | 418 | -   | - | 687    | 228            | <b>AT3G27920.</b> | Openheimer et al., 1991    |
| 1   | 334             | 848 | -   | -   | - | 1182   | 393            | <b>AT3G09230</b>  | -                          |
| 2   | 157             | 130 | 535 | -   | - | 822    | 273            | <b>AT2G47190.</b> | Abe et al., 2003           |
| 3   | 133             | 130 | 511 | -   | - | 774    | 257            | <b>AT1G22640.</b> | Curated by TAIR            |
| 4   | 263             | 586 | -   | -   | - | 849    | 282            | <b>AT4G38620.</b> | Jin et al., 2000           |
| 5   | 296             | 454 | -   | -   | - | 750    | 249            | <b>AT3G13540.</b> | Li et al., 1996            |
| 6   | 263             | 448 | -   | -   | - | 711    | 236            | <b>AT4G09460.</b> | Li and Parish, 1995        |
| 7   | 263             | 547 | -   | -   | - | 810    | 269            | <b>AT2G16720.</b> | Li and Parish, 1995        |
| 8   | 133             | 130 | 376 | -   | - | 639    | 212            | <b>AT1G35515.</b> | Zhu et al., 2005           |
| 9   | 263             | 711 | 37  | -   | - | 1011   | 336            | <b>AT5G16770.</b> | -                          |
| 10  | 139             | 130 | 451 | -   | - | 720    | 239            | <b>AT3G12820.</b> | -                          |
| 11  | 133             | 130 | 769 | -   | - | 1032   | 343            | <b>AT3G62610.</b> | Stracke et al., 2007       |
| 12  | 133             | 130 | 853 | -   | - | 1116   | 371            | <b>AT2G47460.</b> | Mehrtens et al., 2005      |
| 13  | 133             | 130 | 478 | -   | - | 741    | 246            | <b>AT1G06180.</b> | Kirik et al., 1998         |
| 14  | 133             | 130 | 487 | -   | - | 750    | 249            | <b>AT2G31180.</b> | -                          |
| 15  | 133             | 130 | 595 | -   | - | 858    | 285            | <b>AT3G23250.</b> | Agarwal et al., 2006       |
| 16  | 133             | 130 | 350 | 368 | - | 981    | 326            | <b>AT5G15310.</b> | Baumann et al., 2007       |
| 17  | 133             | 130 | 610 | -   | - | 873    | 290            | <b>AT3G61250.</b> | -                          |
| 18  | 127             | 130 | 595 | -   | - | 852    | 283            | <b>AT4G25560</b>  | Ballesteros et al., 2001   |
| 19  | 133             | 130 | 544 | -   | - | 807    | 268            | <b>AT5G52260</b>  | -                          |
| 20  | 263             | 586 | -   | -   | - | 849    | 282            | <b>AT1G66230.</b> | -                          |
| 21  | 157             | 130 | 394 | -   | - | 681    | 226            | <b>AT3G27810.</b> | Mandaokar et al., 2006     |
| 22  | 188             | 124 | 459 | -   | - | 771    | 256            | <b>AT5G40430</b>  | -                          |
| 23  | 133             | 130 | 397 | -   | - | 660    | 219            | <b>AT5G40330.</b> | Kirik et al., 2001         |
| 24  | 148             | 130 | 367 | -   | - | 645    | 214            | <b>AT5G40350.</b> | Yang et al., 2007b         |
| 25  | 319             | 785 | -   | -   | - | 1104   | 367            | <b>AT2G39880</b>  | -                          |
| 26  | 160             | 130 | 814 | -   | - | 1104   | 367            | <b>AT3G13890.</b> | Yang et al., 2007a         |
| 27  | 124             | 130 | 101 | 362 | - | 717    | 238            | <b>AT3G53200</b>  | -                          |
| 28  | 133             | 130 | 838 | -   | - | 1101   | 366            | <b>AT5G61420.</b> | Gigolashvili et al., 2007b |
| 29  | 133             | 130 | 748 | -   | - | 1011   | 336            | <b>AT5G07690.</b> | Gigolashvili et al., 2007c |
| 30  | 133             | 130 | 709 | -   | - | 972    | 323            | <b>AT3G28910.</b> | Vailleau et al., 2002      |
| 31  | 133             | 130 | 730 | -   | - | 993    | 330            | <b>AT1G74650.</b> | -                          |
| 32  | 263             | 562 | -   | -   | - | 825    | 274            | <b>AT4G34990.</b> | Preston et al., 2004       |
| 33  | 345             | 967 | 251 | -   | - | 1563   | 520            | <b>AT5G06100.</b> | Reyes and Chua, 2007       |
| 34  | 133             | 130 | 625 | -   | - | 888    | 295            | <b>AT5G60890.</b> | Celenza et al., 2005       |

|    |     |      |     |   |   |      |     |                   |                             |
|----|-----|------|-----|---|---|------|-----|-------------------|-----------------------------|
| 35 | 133 | 130  | 691 | - | - | 954  | 317 | <b>AT3G28470.</b> | -                           |
| 36 | 136 | 130  | 736 | - | - | 1002 | 333 | <b>AT5G57620.</b> | -                           |
| 37 | 136 | 130  | 724 | - | - | 990  | 329 | <b>AT5G23000.</b> | Keller et al., 2006         |
| 38 | 136 | 130  | 631 | - | - | 897  | 298 | <b>AT2G36890.</b> | Müller et al., 2006         |
| 39 | 266 | 780  | 37  | - | - | 1083 | 360 | <b>AT4G17785.</b> | -                           |
| 40 | 133 | 130  | 529 | - | - | 792  | 263 | <b>AT5G14340.</b> | -                           |
| 41 | 133 | 130  | 586 | - | - | 849  | 282 | <b>AT4G28110.</b> | Cominelli et al., 2007      |
| 42 | 507 | -    | -   | - | - | 507  | 168 | <b>AT4G12350</b>  | -                           |
| 43 | 133 | 130  | 721 | - | - | 984  | 327 | <b>AT5G16600.</b> | -                           |
| 44 | 918 | -    | -   | - | - | 918  | 305 | <b>AT5G67300</b>  | Jung et al., 2007           |
| 45 | 151 | 130  | 505 | - | - | 786  | 261 | <b>AT3G48920</b>  | -                           |
| 46 | 281 | 562  | -   | - | - | 843  | 280 | <b>AT5G12870.</b> | -                           |
| 47 | 133 | 130  | 541 | - | - | 804  | 267 | <b>AT1G18710.</b> | -                           |
| 48 | 118 | 130  | 523 | - | - | 771  | 256 | <b>AT3G46130</b>  | Li et al., 2006             |
| 49 | 133 | 130  | 697 | - | - | 960  | 319 | <b>AT5G54230.</b> | -                           |
| 50 | 133 | 130  | 682 | - | - | 945  | 314 | <b>AT1G57560.</b> | -                           |
| 51 | 136 | 130  | 793 | - | - | 1059 | 352 | <b>AT1G18570.</b> | Gigolashvili et al., 2007a  |
| 52 | 118 | 426  | 206 | - | - | 750  | 249 | <b>AT1G17950</b>  | -                           |
| 53 | 133 | 130  | 670 | - | - | 933  | 310 | <b>AT5G65230.</b> | -                           |
| 54 | 121 | 432  | 179 | - | - | 732  | 243 | <b>AT1G73410</b>  | -                           |
| 55 | 169 | 130  | 748 | - | - | 1047 | 348 | <b>AT4G01680.</b> | -                           |
| 56 | 382 | 426  | 164 | - | - | 972  | 323 | <b>AT5G17800</b>  | Curated by TAIR             |
| 57 | 172 | 130  | 319 | - | - | 621  | 206 | <b>AT3G01530.</b> | -                           |
| 58 | 139 | 130  | 556 | - | - | 825  | 274 | <b>AT1G16490.</b> | -                           |
| 59 | 121 | 130  | 457 | - | - | 708  | 235 | <b>AT5G59780</b>  | Li et al., 2006             |
| 60 | 133 | 130  | 580 | - | - | 843  | 280 | <b>AT1G08810.</b> | Cominelli et al., 2005      |
| 61 | 133 | 130  | 838 | - | - | 1101 | 366 | <b>AT1G09540.</b> | Liang et al., 2005          |
| 62 | 154 | 130  | 577 | - | - | 861  | 286 | <b>AT1G68320.</b> | -                           |
| 63 | 139 | 130  | 616 | - | - | 885  | 294 | <b>AT1G79180.</b> | -                           |
| 64 | 341 | 127  | 804 | - | - | 1272 | 423 | <b>AT5G11050</b>  | -                           |
| 65 | 372 | 1009 | 281 | - | - | 1662 | 553 | <b>AT3G11440.</b> | Millar and Gubler, 2005     |
| 66 | 145 | 130  | 337 | - | - | 612  | 203 | <b>AT5G14750.</b> | Lee and Schiefelbein., 1999 |
| 67 | 163 | 761  | -   | - | - | 924  | 307 | <b>AT3G12720.</b> | -                           |
| 68 | 136 | 130  | 859 | - | - | 1125 | 374 | <b>AT5G65790.</b> | -                           |
| 69 | 160 | 593  | -   | - | - | 753  | 250 | <b>AT4G33450</b>  | -                           |
| 70 | 930 | -    | -   | - | - | 930  | 309 | <b>AT2G23290</b>  | -                           |
| 71 | 281 | 529  | -   | - | - | 810  | 269 | <b>AT3G24310.</b> | -                           |

|     |      |     |     |     |     |      |     |                   |                                           |
|-----|------|-----|-----|-----|-----|------|-----|-------------------|-------------------------------------------|
| 72  | 139  | 130 | 622 | -   | -   | 891  | 296 | <b>AT1G56160.</b> | Van der Ent et al., 2008                  |
| 73  | 963  | -   | -   | -   | -   | 963  | 320 | <b>AT4G37260</b>  | -                                         |
| 74  | 136  | 130 | 709 | -   | -   | 975  | 324 | <b>AT4G05100.</b> | -                                         |
| 75  | 121  | 130 | 496 | -   | -   | 747  | 248 | <b>AT1G56650.</b> | Borevitz et al., 2000                     |
| 76  | 133  | 130 | 754 | -   | -   | 1017 | 338 | <b>AT5G07700.</b> | Gigolashvili et al., 2007c                |
| 77  | 906  | -   | -   | -   | -   | 906  | 301 | <b>AT3G50060</b>  | Shin et al., 2007                         |
| 78  | 175  | 130 | 619 | -   | -   | 924  | 307 | <b>AT5G49620.</b> | -                                         |
| 79  | 115  | 130 | 541 | -   | -   | 786  | 261 | <b>AT4G13480.</b> | -                                         |
| 80  | 133  | 130 | 700 | -   | -   | 963  | 320 | <b>AT5G56110.</b> | -                                         |
| 81  | 309  | 975 | -   | -   | -   | 1284 | 427 | <b>AT2G26960.</b> | -                                         |
| 82  | 133  | 130 | 343 | -   | -   | 606  | 201 | <b>AT5G52600.</b> | -                                         |
| 83  | 317  | 715 | -   | -   | -   | 1032 | 343 | <b>AT3G08500.</b> | -                                         |
| 84  | 136  | 130 | 667 | -   | -   | 933  | 310 | <b>AT3G49690.</b> | Müller et al., 2006                       |
| 85  | 263  | 538 | -   | -   | -   | 801  | 266 | <b>AT4G22680.</b> | -                                         |
| 86  | 133  | 130 | 796 | -   | -   | 1059 | 352 | <b>AT5G26660.</b> | -                                         |
| 87  | 136  | 130 | 652 | -   | -   | 918  | 305 | <b>AT4G37780.</b> | -                                         |
| 88  | 108  | 47  | 57  | 73  | 56  | 1455 | 484 | <b>AT2G02820</b>  | Lai et al., 2005                          |
| 89  | 271  | 302 | -   | -   | -   | 573  | 190 | <b>AT5G39700</b>  | -                                         |
| 90  | 121  | 130 | 499 | -   | -   | 750  | 249 | <b>AT1G66390.</b> | Borevitz et al., 2000                     |
| 91  | 1104 | -   | -   | -   | -   | 1104 | 367 | <b>AT2G37630</b>  | Byrne et al., 2000; Nurmberg et al., 2007 |
| 92  | 133  | 130 | 742 | -   | -   | 1005 | 334 | <b>AT5G10280.</b> | -                                         |
| 93  | 133  | 130 | 835 | -   | -   | 1098 | 365 | <b>AT1G34670.</b> | -                                         |
| 94  | 133  | 130 | 739 | -   | -   | 1002 | 333 | <b>AT3G47600.</b> | -                                         |
| 95  | 133  | 130 | 553 | -   | -   | 816  | 271 | <b>AT1G74430.</b> | -                                         |
| 96  | 133  | 130 | 796 | -   | -   | 1059 | 352 | <b>AT5G62470.</b> | -                                         |
| 97  | 306  | 649 | 215 | -   | -   | 1170 | 389 | <b>AT4G26930.</b> | -                                         |
| 98  | 677  | 127 | 480 | -   | -   | 1284 | 427 | <b>AT4G18770</b>  | Kasahara et al., 2005                     |
| 99  | 287  | 451 | -   | -   | -   | 738  | 245 | <b>AT5G62320.</b> | -                                         |
| 100 | 104  | 127 | 474 | -   | -   | 705  | 234 | <b>AT2G25230</b>  | -                                         |
| 101 | 303  | 859 | 311 | -   | -   | 1473 | 490 | <b>AT2G32460.</b> | Reyes and Chua, 2007                      |
| 102 | 133  | 130 | 790 | -   | -   | 1053 | 350 | <b>AT4G21440.</b> | Denekamp & Smeekens, 2003                 |
| 103 | 133  | 130 | 850 | -   | -   | 1113 | 370 | <b>AT1G63910.</b> | Higginson et al., 2003                    |
| 104 | 297  | 864 | -   | -   | -   | 1161 | 386 | <b>AT2G26950</b>  | -                                         |
| 105 | 424  | 369 | 200 | -   | -   | 993  | 330 | <b>AT1G69560</b>  | -                                         |
| 106 | 137  | 125 | 130 | 353 | 422 | 1167 | 388 | <b>AT3G01140.</b> | -                                         |
| 107 | 263  | 666 | 37  | -   | -   | 966  | 321 | <b>AT3G02940.</b> | -                                         |
| 108 | 154  | 130 | 688 | -   | -   | 972  | 323 | <b>AT3G06490.</b> | Mengiste et al., 2003                     |

|     |     |      |     |     |    |      |     |                   |                            |
|-----|-----|------|-----|-----|----|------|-----|-------------------|----------------------------|
| 109 | 337 | 863  | -   | -   | -  | 1200 | 399 | <b>AT3G55730</b>  | -                          |
| 110 | 304 | 288  | 326 | -   | -  | 918  | 305 | <b>AT3G29020</b>  | -                          |
| 111 | 133 | 130  | 766 | -   | -  | 1029 | 342 | <b>AT5G49330.</b> | Stracke et al., 2007       |
| 112 | 193 | 130  | 409 | -   | -  | 732  | 243 | <b>AT1G48000.</b> | -                          |
| 113 | 121 | 130  | 490 | -   | -  | 741  | 246 | <b>AT1G66370.</b> | Gonzalez et al., 2007      |
| 114 | 121 | 130  | 169 | -   | -  | 420  | 139 | <b>AT1G66380.</b> | Gonzalez et al., 2007      |
| 115 | 500 | 127  | 453 | -   | -  | 1080 | 359 | <b>AT5G40360</b>  | -                          |
| 116 | 151 | 130  | 571 | -   | -  | 852  | 283 | <b>AT1G25340.</b> | -                          |
| 117 | 397 | 446  | -   | -   | -  | 843  | 280 | <b>AT1G26780</b>  | -                          |
| 118 | 144 | 449  | 127 | 594 | -  | 1314 | 437 | <b>AT3G27785</b>  | -                          |
| 119 | 341 | 127  | 825 | -   | -  | 1293 | 430 | <b>AT5G58850</b>  | -                          |
| 120 | 327 | 1245 | -   | -   | -  | 1572 | 523 | <b>AT5G55020.</b> | -                          |
| 121 | 178 | 130  | 523 | -   | -  | 831  | 276 | <b>AT3G30210.</b> | -                          |
| 122 | 133 | 130  | 739 | -   | -  | 1002 | 333 | <b>AT1G74080.</b> | Gigolashvili et al., 2007a |
| 123 | 139 | 130  | 508 | -   | -  | 777  | 258 | <b>AT5G35550.</b> | Nesi et al., 2001          |
| 124 | 93  | 47   | 57  | 73  | 56 | 2001 | 666 | <b>AT1G14350</b>  | Lai et al., 2005           |
| 125 | 188 | 262  | 444 | -   | -  | 894  | 297 | <b>AT3G60460</b>  | Rotman et al., 2005        |

Average Prot Length 312.0

\*Function REF

**Abe H, Urao T, Ito T, Seki M, Shinozaki K, Yamaguchi-Shinozaki K** (2003) Arabidopsis AtMYC2 (bHLH) and AtMYB2 (MYB) Function as Transcriptional Activators in Abscisic Acid Signaling. *Plant Cell* 15: 63-78

**Baumann K, Perez-Rodriguez M, Bradley D, Venail J, Bailey P, Jin H, Koes R, Roberts K, Martin C** (2007) Control of cell and petal morphogenesis by R2R3 MYB transcription factors. *Development* 134(9):1691-701

**Byrne ME, Barley R, Curtis M, Arroyo JM, Dunham M, Hudson A, Martienssen RA** (2000) Asymmetric leaves1 mediates leaf patterning and stem cell function in Arabidopsis. *Nature* 408(6815):967-71

**Cominelli E, Sala T, Calvi D, Gusmaroli G, Tonelli C** (2007) Over-expression of the Arabidopsis AtMYB41 gene alters cell expansion and leaf surface permeability. *Plant J.* PMID: 17971045

**Denekamp M, Smeekens SC.** (2003) Integration of wounding and osmotic stress signals determines the expression of the AtMYB102 transcription factor gene. *Plant Physiol.* 132(3):1415-23

**Jung C, Seo JS, Han SW, Koo YJ, Kim CH, Song SI, Nahm BH, Choi YD, Cheong JJ.** (2007) Overexpression of AtMYB44 enhances stomatal closure to confer abiotic stress tolerance in transgenic Arabidopsis. *Plant Physiol.* PMID: 18162593

**Kasahara RD, Portereiko MF, Sandaklie-Nikolova L, Rabiger DS, Drews GN** (2005) MYB98 is required for pollen tube guidance and synergid cell differentiation in Arabidopsis. *Plant Cell*. 17(11):2981-92

**Keller T, Abbott J, Moritz T, Doerner P** (2006) Arabidopsis REGULATOR OF AXILLARY MERISTEMS1 controls a leaf axil stem cell niche and modulates vegetative development. *Plant Cell* 18(3):598-611

**Kirik V, Kölle K, Wohlfarth T, Miséra S, Bäumlein H** (1998) Ectopic expression of a novel MYB gene modifies the architecture of the Arabidopsis inflorescence. *Plant J*. 13(6):729-42

**Kirik V, Schnittger A, Radchuk V, Adler K, Hülskamp M, Bäumlein H** (2001) Ectopic expression of the Arabidopsis AtMYB23 gene induces differentiation of trichome cells. *Dev Biol*. 235(2):366-77

**Lai LB, Nadeau JA, Lucas J, Lee EK, Nakagawa T, Zhao L, Geisler M, Sack FD** (2005) The Arabidopsis R2R3 MYB proteins FOUR LIPS and MYB88 restrict divisions late in the stomatal cell lineage. *Plant Cell* 17(10):2754-67

**Lee MM, Schiefelbein J** (1999) WEREWOLF, a MYB-related protein in Arabidopsis, is a position-dependent regulator of epidermal cell patterning. *Cell* 99(5):473-83

**Li SF, Parish RW** (1995) Isolation of two novel myb-like genes from Arabidopsis and studies on the DNA-binding properties of their products. *Plant J*. 8(6):963-72

**Li SF, Santini JM, Nicolaou O, Parish RW** (1996) A novel myb-related gene from Arabidopsis thaliana. *FEBS Lett*. 379(2):117-21

**Nurmburg PL, Knox KA, Yun BW, Morris PC, Shafiei R, Hudson A, Loake GJ** (2007) The developmental selector AS1 is an evolutionarily conserved regulator of the plant immune response. *Proc Natl Acad Sci USA* 104(47):18795-800

**Oppenheimer D, Herman P, Sivakumaran S, Esch J, Marks M** (1991) A MYB gene required for leaf trichome differentiation in Arabidopsis is expressed in stipules. *Cell* 67, 483–493

**Rotman N, Durbarry A, Wardle A, Yang WC, Chaboud A, Faure JE, Berger F, Twell D.** (2005) A novel class of MYB factors controls sperm-cell formation in plants. *Curr Biol*. 15(3):244-8

**Shin R, Burch AY, Huppert KA, Tiwari SB, Murphy AS, Guilfoyle TJ, Schachtman DP** (2007) The Arabidopsis transcription factor MYB77 modulates auxin signal transduction. *Plant Cell* 8:2440-53

**Van der Ent S, Verhagen BW, Van Doorn R, Bakker D, Verlaan MG, Pel MJ, Joosten RG, Proveniers MC, Van Loon LC, Ton J, Pieterse CM** (2008) MYB72 Is Required in Early Signaling Steps of Rhizobacteria-Induced Systemic Resistance in Arabidopsis. *Plant Physiol*. PMID: 18218967
