# Supplementary material for: Analysis of the grape MYB R2R3 subfamily reveals expanded wine quality-related clades and conserved gene structure organization across Vitis and Arabidopsis genomes
Source: PubMed Central journal article supplement (PMC2507771; doi:10.1186/1471-2229-8-83), 2008-07-22
Supplement: 1471-2229-8-83-S6.pdf [file 1471-2229-8-83-S6.pdf]

| <b>Gene ID<br/>(Genebank Accession)</b>      | <b>Primer ID</b> | <b>Sequence*</b>                 |
|----------------------------------------------|------------------|----------------------------------|
| <i>VvMYB12 like</i>                          | QPCR_MYB fw      | 5' CAGTGGCCCTCCTGCTCTT           |
|                                              | QPCR_MYB rev     | 5' CCATCACTGTCCTCCCATAACC        |
| <i>VvMYB14 like<br/>(EU181424)</i>           | TOPO_MYB fw      | 5' caccATGGGGAGAGCTCCTTGTTGTGAG  |
|                                              | TOPO_MYB rev     | 5' TCATATTTCTGATAATTCATGCAA      |
|                                              | QPCR_MYB fw      | 5' GGAGAGCCTTGGGTATGGA           |
|                                              | QPCR_MYB rev     | 5' CGACCTTAATGCAGGGTGTA          |
| <i>VvMYB24 like<br/>(EU181426)</i>           | TOPO_MYB fw      | 5' caccATGGATAAAAAACCCTGCAATTCTC |
|                                              | TOPO_MYB rev     | 5' TTAATCTCCATTAAGTAGCTGCAT      |
|                                              | QPCR_MYB fw      | 5' TCAGACACATGATCAAGCAACT        |
|                                              | QPCR_MYB rev     | 5' CGAGATTGGCAGGGTAGGA           |
| <i>VvMYB30 like<br/>(EF071984)</i>           | TOPO_MYB fw      | 5' caccATGGGGAGGCCACCTTGCTG      |
|                                              | TOPO_MYB rev     | 5' CTAGAAGAGCTGAGCAGTGT          |
|                                              | QPCR_MYB fw      | 5' CTCAAGTCCCTCTCACAAATG         |
|                                              | QPCR_MYB rev     | 5' TGTCAATTAGGTCTTCTTGTTT        |
| <i>VvMYB60 like<br/>(EU816358)</i>           | TOPO_MYB fw      | 5' caccATGGGAAGGCCTCCTTGCTGTGAT  |
|                                              | TOPO_MYB rev     | 5' TCAGAATATTGGAGAGAGTTGATC      |
|                                              | QPCR_MYB fw      | 5' TTGAGTACGAAAACCTGAATGAT       |
|                                              | QPCR_MYB rev     | 5' GGAGGGTTGTGCTTCTTCTGAT        |
| <i>VvMYBC2 repressor like<br/>(EU181425)</i> | TOPO_MYB fw      | 5' caccATGAGGAAGCCCTGCTGTGATAAGC |
|                                              | TOPO_MYB rev     | 5' TCATCAAAGAGGAGCAGCGTGGA       |
|                                              | QPCR_MYB fw      | 5' GACCGCAACATCATCTGGTT          |
|                                              | QPCR_MYB rev     | 5' GCACGCCGGTTATCATCT            |
| <i>VvMYB4 (EF113078)</i>                     | QPCR_MYB fw      | 5' ACCGGACGTTACAACCATATC         |
|                                              | QPCR_MYB rev     | 5' TCCGTAACCTGGGTTTTTCTCA        |

\* TOPOSD cloning vector (INVITROGEN) requires the "CACC" sequence in the forward primer
